# Supplementary material for: Occupational Exposure to Hexavalent Chromium, Nickel and PAHs: A Mixtures Risk Assessment Approach Based on Literature Exposure Data from European Countries
Source: MDPI journal article supplement (doi:10.3390/toxics10080431), 2022-07-29
Supplement: s1 [file s1]

Table S1: Database searches.

| Combinations searched | Search terms (Filters: Humans/Journal Articles/Languages English, Spanish, French or Portuguese, 2000-2020)                                                                                                                                                                                                                                                                                                                                                                                                                                                                                                                                                                                                                                                         | Results    |
|-----------------------|---------------------------------------------------------------------------------------------------------------------------------------------------------------------------------------------------------------------------------------------------------------------------------------------------------------------------------------------------------------------------------------------------------------------------------------------------------------------------------------------------------------------------------------------------------------------------------------------------------------------------------------------------------------------------------------------------------------------------------------------------------------------|------------|
| PAHs + Ni             | ("human monitoring" OR "human biological monitoring" OR "occupational monitoring" OR "occupational exposure" OR "biomarkers of exposure" OR worker* OR "human exposure" OR "occupational exposure" OR "occupational exposure" [MeSH Terms] OR "occupational settings" OR "industrial settings" OR "occupational hygiene" OR "industrial hygiene" OR "human biomonitoring" OR "biomonitoring" [MeSH Terms] OR "exposure monitoring" OR "exposure at the workplace" OR "workplace" OR "occupational hazard" OR "occupational health surveillance") AND (("Polycyclic aromatic hydrocarbons" OR "benzo(a)pyrene" OR pyrene* OR PAHs OR PAHs [MeSH Terms]) AND ( nickel OR ni))                                                                                         | 50         |
| PAHs + Cr(VI)         | ("human monitoring" OR "human biological monitoring" OR "occupational monitoring" OR "occupational exposure" OR "biomarkers of exposure" OR worker* OR "human exposure" OR "occupational exposure" OR "occupational exposure" [MeSH Terms] OR "occupational settings" OR "industrial settings" OR "occupational hygiene" OR "industrial hygiene" OR "human biomonitoring" OR "biomonitoring" [MeSH Terms] OR "exposure monitoring" OR "exposure at the workplace" OR "workplace" OR "occupational hazard" OR "occupational health surveillance") AND (("Polycyclic aromatic hydrocarbons" OR "benzo(a)pyrene" OR pyrene* OR PAHs OR PAHs [MeSH Terms]) AND ("hexavalent chromium" OR "Cr(VI)" OR "chromium" OR "chromate" OR "chromium (VI)"))                      | 35         |
| Ni + Cr(VI)           | ("human monitoring" OR "human biological monitoring" OR "occupational monitoring" OR "occupational exposure" OR "biomarkers of exposure" OR worker* OR "human exposure" OR "occupational exposure" OR "occupational exposure" [MeSH Terms] OR "occupational settings" OR "industrial settings" OR "occupational hygiene" OR "industrial hygiene" OR "human biomonitoring" OR "biomonitoring" [MeSH Terms] OR "exposure monitoring" OR "exposure at the workplace" OR "workplace" OR "occupational hazard" OR "occupational health surveillance") AND ("hexavalent chromium" OR "Cr(VI)" OR "chromium" OR "chromate" OR "chromium (VI)") AND ( nickel OR ni))                                                                                                        | 250        |
| PAHs + Ni + Cr(VI)    | ("human monitoring" OR "human biological monitoring" OR "occupational monitoring" OR "occupational exposure" OR "biomarkers of exposure" OR worker* OR "human exposure" OR "occupational exposure" OR "occupational exposure" [MeSH Terms] OR "occupational settings" OR "industrial settings" OR "occupational hygiene" OR "industrial hygiene" OR "human biomonitoring" OR "biomonitoring" [MeSH Terms] OR "exposure monitoring" OR "exposure at the workplace" OR "workplace" OR "occupational hazard" OR "occupational health surveillance") AND (("Polycyclic aromatic hydrocarbons" OR "benzo(a)pyrene" OR pyrene* OR PAHs OR PAHs [MeSH Terms]) AND ( nickel OR ni)) AND ("hexavalent chromium" OR "Cr(VI)" OR "chromium" OR "chromate" OR "chromium (VI)")) | 21         |
| <b>Total studies</b>  |                                                                                                                                                                                                                                                                                                                                                                                                                                                                                                                                                                                                                                                                                                                                                                     | <b>356</b> |
